# Supplementary material for: Stable and sporadic symbiotic communities of coral and algal holobionts
Source: PubMed Central journal article supplement — ISME J. 2015 Nov 10;10(5):1157–69. doi: 10.1038/ismej.2015.190 (PMC5029208; doi:10.1038/ismej.2015.190), 2015-11-10

Supplemental Figure Captions.

**Supplemental Figure 1.** Multi-dimensional scaling was performed on a Bray-Curtis distance matrix in order to visualize compositional differences between sampled bacterial communities at the OTU level. The island the sample was taken from is the color. The host group (i.e., species of coral or algal group) is labeled above the point.

**Supplemental Figure 2.** A neighbor joining tree was made from a Bray-Curtis distance matrix of compositional differences of OTUs classified at the genera level assigned as either stable or sporadic. AH = *A. hyacinthus*, AR = *A. rosaria*, PL = *P. lutea*. Blue circles indicate significant groups determined by the simprof function.

Supplemental Figure 1.

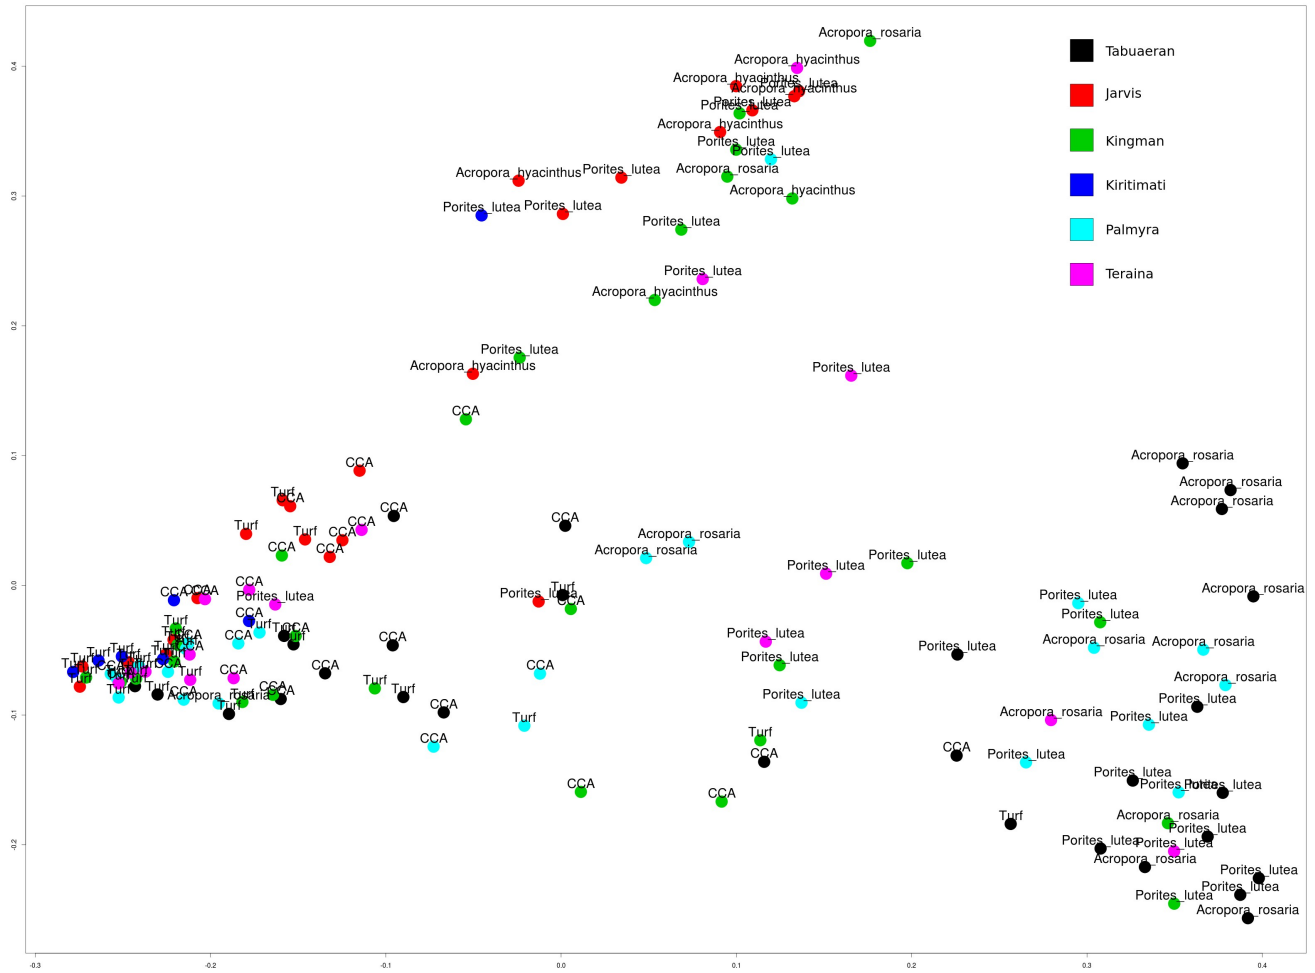

Supplemental Figure 2.

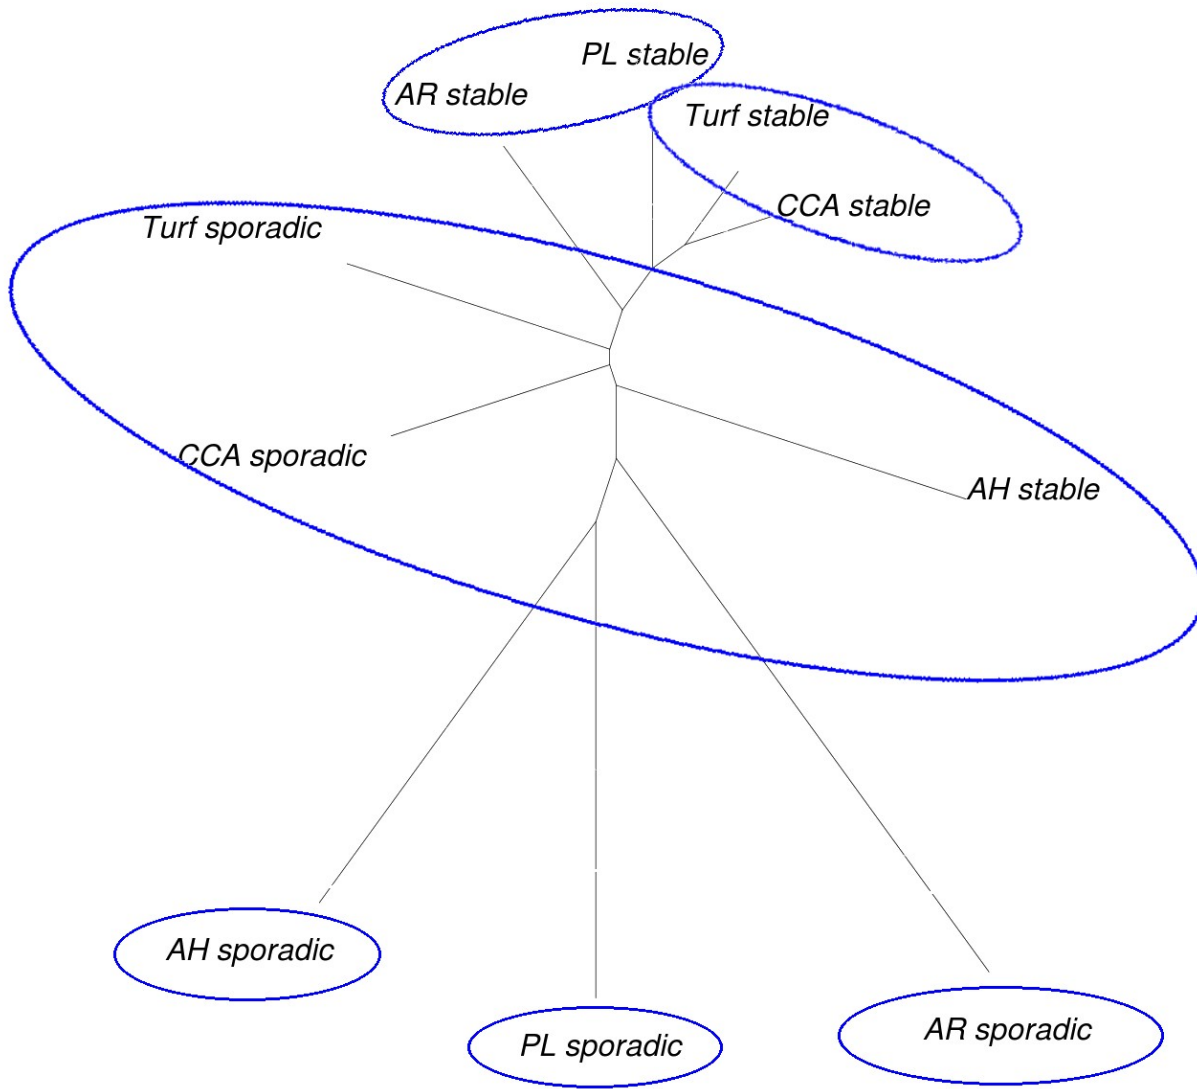

Supplement: ismej2015190x1.pdf [file ismej2015190x1.pdf]
