# Supplementary material for: Stable and sporadic symbiotic communities of coral and algal holobionts
Source: PubMed Central journal article supplement — ISME J. 2015 Nov 10;10(5):1157–69. doi: 10.1038/ismej.2015.190 (PMC5029208; doi:10.1038/ismej.2015.190), 2015-11-10
Supplement: ismej2015190x2.pdf [file ismej2015190x2.pdf]

**Supplemental Table 1. P-values for permutation test for homogeneity of multivariate dispersions.**

Differences in the compositional variance as calculated through the betadisper function were tested for significance using a permutation test. The permutation tests for significant differences of median distance to centroid. Bold text indicate a p-value that is significant ( $p < 0.05$ ).

|                      | <i>A. rosaria</i> | <i>P. lutea</i> | CCA          | Turf         |
|----------------------|-------------------|-----------------|--------------|--------------|
| <i>A. hyacinthus</i> | <b>0.014</b>      | <b>0.021</b>    | <b>0.003</b> | <b>0.001</b> |
| <i>A. rosaria</i>    |                   | 0.994           | <b>0.001</b> | <b>0.001</b> |
| <i>P. lutea</i>      |                   |                 | <b>0.001</b> | <b>0.001</b> |
| CCA                  |                   |                 |              | 0.848        |
| Turf                 |                   |                 |              |              |

**Supplemental Table 2. Sample information.** Number of sampled bacterial communities for each host and the island they were sampled from.

|            | <i>A. hyacinthus</i> | <i>A. rosaria</i> | <i>P. lutea</i> | CCA | Turf |
|------------|----------------------|-------------------|-----------------|-----|------|
| Tabuaeran  | 0                    | 6                 | 8               | 8   | 8    |
| Jarvis     | 5                    | 0                 | 5               | 5   | 8    |
| Kingman    | 2                    | 3                 | 8               | 8   | 8    |
| Kiritimati | 0                    | 0                 | 2               | 1   | 4    |
| Palmyra    | 0                    | 6                 | 7               | 6   | 6    |
| Teraina    | 1                    | 1                 | 5               | 6   | 4    |

**Supplemental Table 3.** *Acropora hyacinthus* OTU level taxonomy assignments and Abundance-Ubiquity test result.

**Supplemental Table 4** *Acropora rosaria* OTU level taxonomy assignments and Abundance-Ubiquity test result.

**Supplemental Table 5.** *Porites lutea* OTU level taxonomy assignments and Abundance-Ubiquity test result.

**Supplemental Table 6.** CCA OTU level taxonomy assignments and Abundance-Ubiquity test result.

**Supplemental Table 7.** Turf OTU level taxonomy assignments and Abundance-Ubiquity test result.
